# Supplementary material for: Daclatasvir, sofosbuvir, and ribavirin for hepatitis C virus genotype 3 and advanced liver disease: A randomized phase III study (ALLY‐3+)
Source: PubMed Central journal article supplement — Hepatology. 2016 Mar 4;63(5):1430–41. doi: 10.1002/hep.28473 (PMC5069621; doi:10.1002/hep.28473), 2016-03-04
Supplement: HEP-63-1430-s001.pdf [file HEP-63-1430-s001.pdf]

## Supplementary Materials for

A Randomized Phase III Study of Daclatasvir, Sofosbuvir and Ribavirin for Hepatitis C Virus Genotype 3 With Advanced Liver Disease: ALLY-3+.

*Leroy V, Angus P, Bronowicki J-P, Dore G, Hezode C, Pianko S, Pol S, Stuart K, Tse E, McPhee F, Bhore R, Jimenez-Exposito M, Thompson A.*

**HEP-15-2497**

## Contents

| Page |                                                                                                        |
|------|--------------------------------------------------------------------------------------------------------|
| 3    | <b>Figure S1.</b> SVR12 in Selected Key Subgroups                                                      |
| 4    | <b>Table S1.</b> Baseline Characteristics of Patients with Advanced Fibrosis and Compensated Cirrhosis |
| 5    | <b>Table S2.</b> SVR12 in Key Subgroups (All)                                                          |
| 8    | <b>Table S3.</b> Adverse Events (All-Cause Grades 1-4) on Treatment                                    |

## Figure S1. SVR12 in Selected Key Subgroups

12-week and 16-week treatment groups combined. Shaded region shows the 95% CI for all 50 treated patients. Data for other subgroups assessed are shown in Table S2.

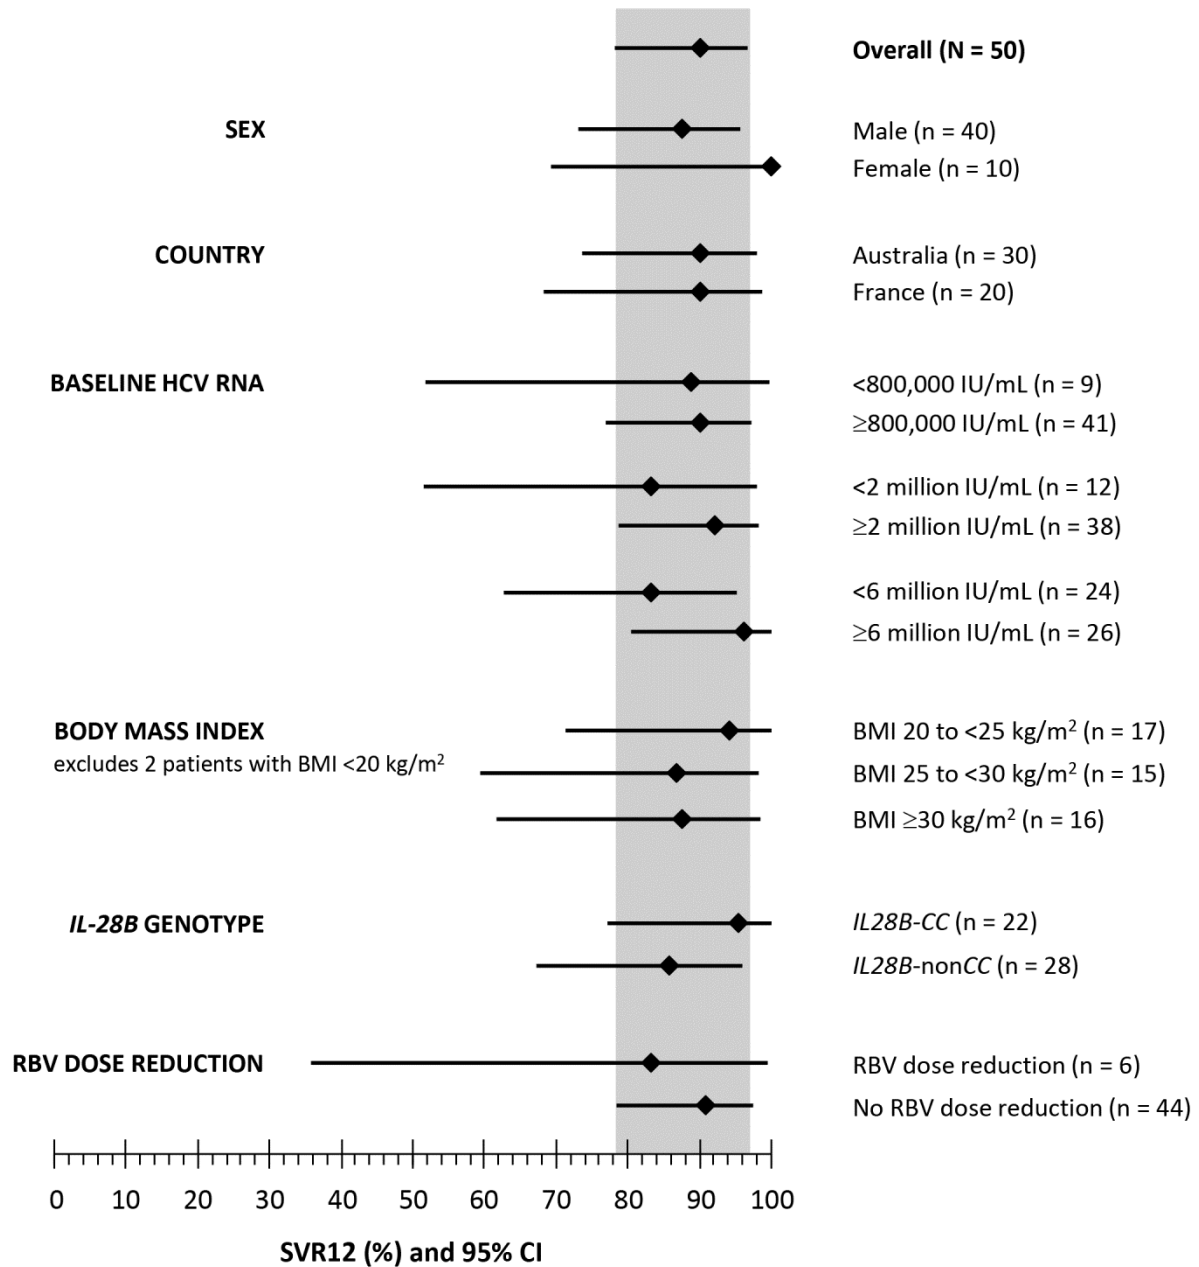

BMI, body mass index; CI, confidence interval; RBV, ribavirin; SVR12, sustained virologic response at posttreatment 12.

**Table S1. Baseline Characteristics of Patients with Advanced Fibrosis or Compensated Cirrhosis**

| Parameter                                                | Advanced Fibrosis* (n = 14) | Cirrhosis* (n = 36) | Total (N = 50) |
|----------------------------------------------------------|-----------------------------|---------------------|----------------|
| Age, median (range) years                                | 53.0 (39–62)                | 55.5 (36–73)        | 53.5 (36–73)   |
| Male, n (%)                                              | 11 (78.6)                   | 29 (80.6)           | 40 (80.0)      |
| Race, n (%)                                              |                             |                     |                |
| White                                                    | 13 (92.9)                   | 36 (100)            | 49 (98.0)      |
| Asian                                                    | 1 (7.1)                     | 0                   | 1 (2.0)        |
| DCV-SOF-RBV treatment group, n (%)                       |                             |                     |                |
| 12 weeks                                                 | 6 (42.9)                    | 18 (50.0)           | 24 (48.0)      |
| 16 weeks                                                 | 8 (57.1)                    | 18 (50.0)           | 26 (52.0)      |
| HCV RNA, median (range) log <sub>10</sub> IU/mL          | 6.68 (4.6–7.8)              | 6.93 (4.7–7.7)      | 6.87 (4.6–7.8) |
| HCV RNA category, n (%)                                  |                             |                     |                |
| >800,000 IU/mL                                           | 9 (64.3)                    | 32 (88.9)           | 41 (82.0)      |
| >2,000,000 IU/mL                                         | 9 (64.3)                    | 29 (80.6)           | 38 (76.0)      |
| >6,000,000 IU/mL                                         | 6 (42.9)                    | 20 (55.6)           | 26 (52.0)      |
| Albumin, median (range) g/L                              | 45 (38–48)                  | 42 (33–46)          | 43 (33–48)     |
| Platelet count, median (range) × 10 <sup>9</sup> cells/L | 214 (138–324)               | 153 (63–299)        | 161 (63–324)   |
| ALT, median (range) U/L                                  | 91 (39–227)                 | 107 (29–326)        | 98 (29–326)    |
| AST, median (range) U/L                                  | 60 (28–117)                 | 101 (45–231)        | 82 (28–231)    |
| Total bilirubin, median (range) mg/dL                    | 0.5 (0.3–1.6)               | 0.5 (0.2–1.5)       | 0.5 (0.2–1.6)  |
| <i>IL28B</i> (rs12979860) genotype, n (%)                |                             |                     |                |
| CC                                                       | 5 (35.7)                    | 17 (47.2)           | 22 (44.0)      |
| CT                                                       | 8 (57.1)                    | 17 (47.2)           | 25 (50.0)      |
| TT                                                       | 1 (7.1)                     | 2 (5.6)             | 3 (6.0)        |
| Prior treatment status, n (%)                            |                             |                     |                |
| Naive                                                    | 7 (50.0)                    | 6 (16.7)            | 13 (26.0)      |
| Experienced                                              | 7 (50.0)                    | 30 (83.3)           | 37 (74.0)      |
| <i>IFN-based</i>                                         | 7 (50.0)                    | 24 (66.7)           | 31 (62.0)      |
| <i>SOF-based</i> <sup>†</sup>                            | 0                           | 6 (16.7)            | 6 (12.0)       |
| Prior treatment outcome                                  |                             |                     |                |
| <i>IFN-based</i>                                         |                             |                     |                |
| <i>Relapse</i>                                           | 5 (35.7)                    | 10 (27.8)           | 15 (30.0)      |
| <i>Null response</i>                                     | 1 (7.1)                     | 5 (13.9)            | 6 (12.0)       |
| <i>Partial response</i>                                  | 0                           | 1 (2.8)             | 1 (2.0)        |
| <i>VBT</i>                                               | 1 (7.1)                     | 1 (2.8)             | 2 (4.0)        |
| <i>Intolerance</i>                                       | 0                           | 5 (13.9)            | 5 (10.0)       |
| <i>Indeterminate</i>                                     | 0                           | 2 (5.6)             | 2 (4.0)        |
| <i>SOF-based</i>                                         |                             |                     |                |
| <i>Relapse</i>                                           | 0                           | 6 (16.7)            | 6 (12.0)       |
| DCV-resistant NS5A polymorphisms, n (%)                  |                             |                     |                |
| A30K                                                     | 2 (14.3)                    | 4 (11.1)            | 6 (12.0)       |
| Y93H                                                     | 0                           | 2 (5.6)             | 2 (4.0)        |

ALT, alanine aminotransferase; AST, aspartate aminotransferase; DCV, daclatasvir; IFN, interferon; RBV, ribavirin; SOF, sofosbuvir.

\*Advanced fibrosis or cirrhosis was determined by biopsy in 10 patients (20%) and FibroScan in 40 patients (80%). See Methods for details.

<sup>†</sup>SOF-RBV (n=5); SOF-RBV-pegIFN (n=1; 12-week arm)

## Table S2. SVR12 in Key Subgroups

HCV RNA measurements are excluded after the start of non-study anti-HCV medication on treatment or during follow-up. SVR12 is based on Next Value Carried Backwards approach.

| Category Subgroup                | DCV+SOF+RBV 12 WK<br>N=24 | DCV+SOF+RBV 16 WK<br>N=26 | Total<br>N=50 |
|----------------------------------|---------------------------|---------------------------|---------------|
| <b>Gender</b>                    |                           |                           |               |
| <b>Male</b>                      |                           |                           |               |
| Responders/Treated (%)           | 15/18 (83.3)              | 20/22 (90.9)              | 35/40 (87.5)  |
| 95% CI                           | (58.6, 96.4)              | (70.8, 98.9)              | (73.2, 95.8)  |
| <b>Female</b>                    |                           |                           |               |
| Responders/Treated (%)           | 6/6 (100.0)               | 4/4 (100.0)               | 10/10 (100.0) |
| 95% CI                           | (54.1, 100.0)             | (39.8, 100.0)             | (69.2, 100.0) |
| <b>Age (Years)</b>               |                           |                           |               |
| <b>&lt; 65</b>                   |                           |                           |               |
| Responders/Treated (%)           | 20/23 (87.0)              | 24/26 (92.3)              | 44/49 (89.8)  |
| 95% CI                           | (66.4, 97.2)              | (74.9, 99.1)              | (77.8, 96.6)  |
| <b>&gt;=65</b>                   |                           |                           |               |
| Responders/Treated (%)           | 1/1 (100.0)               |                           | 1/1 (100.0)   |
| 95% CI                           | (2.5, 100.0)              |                           | (2.5, 100.0)  |
| <b>Race</b>                      |                           |                           |               |
| <b>White</b>                     |                           |                           |               |
| Responders/Treated (%)           | 20/23 (87.0)              | 24/26 (92.3)              | 44/49 (89.8)  |
| 95% CI                           | (66.4, 97.2)              | (74.9, 99.1)              | (77.8, 96.6)  |
| <b>Asian</b>                     |                           |                           |               |
| Responders/Treated (%)           | 1/1 (100.0)               |                           | 1/1 (100.0)   |
| 95% CI                           | (2.5, 100.0)              |                           | (2.5, 100.0)  |
| <b>Country</b>                   |                           |                           |               |
| <b>Australia</b>                 |                           |                           |               |
| Responders/Treated (%)           | 12/14 (85.7)              | 15/16 (93.8)              | 27/30 (90.0)  |
| 95% CI                           | (57.2, 98.2)              | (69.8, 99.8)              | (73.5, 97.9)  |
| <b>France</b>                    |                           |                           |               |
| Responders/Treated (%)           | 9/10 (90.0)               | 9/10 (90.0)               | 18/20 (90.0)  |
| 95% CI                           | (55.5, 99.7)              | (55.5, 99.7)              | (68.3, 98.8)  |
| <b>Baseline HCV RNA</b>          |                           |                           |               |
| <b>&lt; 800,000 Iu/ML</b>        |                           |                           |               |
| Responders/Treated (%)           | 4/4 (100.0)               | 4/5 (80.0)                | 8/9 (88.9)    |
| 95% CI                           | (39.8, 100.0)             | (28.4, 99.5)              | (51.8, 99.7)  |
| <b>&gt;= 800,000 Iu/ML</b>       |                           |                           |               |
| Responders/Treated (%)           | 17/20 (85.0)              | 20/21 (95.2)              | 37/41 (90.2)  |
| 95% CI                           | (62.1, 96.8)              | (76.2, 99.9)              | (76.9, 97.3)  |
| <b>&lt; 2,000,000 Iu/ML</b>      |                           |                           |               |
| Responders/Treated (%)           | 5/6 (83.3)                | 5/6 (83.3)                | 10/12 (83.3)  |
| 95% CI                           | (35.9, 99.6)              | (35.9, 99.6)              | (51.6, 97.9)  |
| <b>&gt;= 2,000,000 Iu/ML</b>     |                           |                           |               |
| Responders/Treated (%)           | 16/18 (88.9)              | 19/20 (95.0)              | 35/38 (92.1)  |
| 95% CI                           | (65.3, 98.6)              | (75.1, 99.9)              | (78.6, 98.3)  |
| <b>&lt; 6,000,000 Iu/ML</b>      |                           |                           |               |
| Responders/Treated (%)           | 11/13 (84.6)              | 9/11 (81.8)               | 20/24 (83.3)  |
| 95% CI                           | (54.6, 98.1)              | (48.2, 97.7)              | (62.6, 95.3)  |
| <b>&gt;= 6,000,000 Iu/ML</b>     |                           |                           |               |
| Responders/Treated (%)           | 10/11 (90.9)              | 15/15 (100.0)             | 25/26 (96.2)  |
| 95% CI                           | (58.7, 99.8)              | (78.2, 100.0)             | (80.4, 99.9)  |
| <b>&lt; Median (7404605)</b>     |                           |                           |               |
| Responders/Treated (%)           | 11/13 (84.6)              | 10/12 (83.3)              | 21/25 (84.0)  |
| 95% CI                           | (54.6, 98.1)              | (51.6, 97.9)              | (63.9, 95.5)  |
| <b>&gt;= Median (7404605)</b>    |                           |                           |               |
| Responders/Treated (%)           | 10/11 (90.9)              | 14/14 (100.0)             | 24/25 (96.0)  |
| 95% CI                           | (58.7, 99.8)              | (76.8, 100.0)             | (79.6, 99.9)  |
| <b>Baseline Cirrhosis Status</b> |                           |                           |               |
| <b>Absent</b>                    |                           |                           |               |
| Responders/Treated (%)           | 6/6 (100.0)               | 8/8 (100.0)               | 14/14 (100.0) |
| 95% CI                           | (54.1, 100.0)             | (63.1, 100.0)             | (76.8, 100.0) |
| <b>Present</b>                   |                           |                           |               |
| Responders/Treated (%)           | 15/18 (83.3)              | 16/18 (88.9)              | 31/36 (86.1)  |
| 95% CI                           | (58.6, 96.4)              | (65.3, 98.6)              | (70.5, 95.3)  |
| <b>Fibrotest Score Category</b>  |                           |                           |               |
| <b>0 - 0.27</b>                  |                           |                           |               |
| Responders/Treated (%)           | 1/1 (100.0)               | 1/1 (100.0)               | 2/2 (100.0)   |
| 95% CI                           | (2.5, 100.0)              | (2.5, 100.0)              | (15.8, 100.0) |
| <b>&gt;0.27 - 0.48</b>           |                           |                           |               |
| Responders/Treated (%)           | 2/2 (100.0)               | 1/1 (100.0)               | 3/3 (100.0)   |
| 95% CI                           | (15.8, 100.0)             | (2.5, 100.0)              | (29.2, 100.0) |
| <b>&gt;0.48 - 0.58</b>           |                           |                           |               |
| Responders/Treated (%)           | 4/4 (100.0)               | 3/4 (75.0)                | 7/8 (87.5)    |
| 95% CI                           | (39.8, 100.0)             | (19.4, 99.4)              | (47.3, 99.7)  |
| <b>&gt;0.58 - 0.74</b>           |                           |                           |               |
| Responders/Treated (%)           | 4/4 (100.0)               | 5/5 (100.0)               | 9/9 (100.0)   |
| 95% CI                           | (39.8, 100.0)             | (47.8, 100.0)             | (66.4, 100.0) |
| <b>&gt;0.74 - 1.00</b>           |                           |                           |               |
| Responders/Treated (%)           | 9/10 (90.0)               | 13/14 (92.9)              | 22/24 (91.7)  |
| 95% CI                           | (55.5, 99.7)              | (66.1, 99.8)              | (73.0, 99.0)  |
| <b>Not Reported</b>              |                           |                           |               |
| Responders/Treated (%)           | 1/3 (33.3)                | 1/1 (100.0)               | 2/4 (50.0)    |
| 95% CI                           | (0.8, 90.6)               | (2.5, 100.0)              | (6.8, 93.2)   |

**Table S2 (cont).**

| Category<br>Subgroup                                   | DCV+SOF+REB 12 WK<br>N=24 | DCV+SOF+REB 16 WK<br>N=26 | Total<br>N=50 |
|--------------------------------------------------------|---------------------------|---------------------------|---------------|
| <b>Fibrosis Stage Stratum</b>                          |                           |                           |               |
| F3                                                     |                           |                           |               |
| Responders/Treated (%)                                 | 6/6 (100.0)               | 8/8 (100.0)               | 14/14 (100.0) |
| 95% CI                                                 | (54.1, 100.0)             | (63.1, 100.0)             | (76.8, 100.0) |
| F4                                                     |                           |                           |               |
| Responders/Treated (%)                                 | 15/18 (83.3)              | 16/18 (88.9)              | 31/36 (86.1)  |
| 95% CI                                                 | (58.6, 96.4)              | (65.3, 98.6)              | (70.5, 95.3)  |
| <b>Prior Treatment Experience</b>                      |                           |                           |               |
| Naive                                                  |                           |                           |               |
| Responders/Treated (%)                                 | 5/6 (83.3)                | 7/7 (100.0)               | 12/13 (92.3)  |
| 95% CI                                                 | (35.9, 99.6)              | (59.0, 100.0)             | (64.0, 99.8)  |
| Experienced                                            |                           |                           |               |
| Responders/Treated (%)                                 | 16/18 (88.9)              | 17/19 (89.5)              | 33/37 (89.2)  |
| 95% CI                                                 | (65.3, 98.6)              | (66.9, 98.7)              | (74.6, 97.0)  |
| <b>Fibrosis Stage Stratum x Prior Treatment Status</b> |                           |                           |               |
| F3 - Naive                                             |                           |                           |               |
| Responders/Treated (%)                                 | 4/4 (100.0)               | 3/3 (100.0)               | 7/7 (100.0)   |
| 95% CI                                                 | (39.8, 100.0)             | (29.2, 100.0)             | (59.0, 100.0) |
| F3 - Experienced                                       |                           |                           |               |
| Responders/Treated (%)                                 | 2/2 (100.0)               | 5/5 (100.0)               | 7/7 (100.0)   |
| 95% CI                                                 | (15.8, 100.0)             | (47.8, 100.0)             | (59.0, 100.0) |
| F4 - Naive                                             |                           |                           |               |
| Responders/Treated (%)                                 | 1/2 (50.0)                | 4/4 (100.0)               | 5/6 (83.3)    |
| 95% CI                                                 | (1.3, 98.7)               | (39.8, 100.0)             | (35.9, 99.6)  |
| F4 - Experienced                                       |                           |                           |               |
| Responders/Treated (%)                                 | 14/16 (87.5)              | 12/14 (85.7)              | 26/30 (86.7)  |
| 95% CI                                                 | (61.7, 98.4)              | (57.2, 98.2)              | (69.3, 96.2)  |
| <b>Baseline BMI (kg/m<sup>2</sup>)</b>                 |                           |                           |               |
| < 20 Kg/M2                                             |                           |                           |               |
| Responders/Treated (%)                                 |                           | 2/2 (100.0)               | 2/2 (100.0)   |
| 95% CI                                                 |                           | (15.8, 100.0)             | (15.8, 100.0) |
| 20 -< 25 Kg/M2                                         |                           |                           |               |
| Responders/Treated (%)                                 | 9/10 (90.0)               | 7/7 (100.0)               | 16/17 (94.1)  |
| 95% CI                                                 | (55.5, 99.7)              | (59.0, 100.0)             | (71.3, 99.9)  |
| 25 -< 30 Kg/M2                                         |                           |                           |               |
| Responders/Treated (%)                                 | 7/7 (100.0)               | 6/8 (75.0)                | 13/15 (86.7)  |
| 95% CI                                                 | (59.0, 100.0)             | (34.9, 96.8)              | (59.5, 98.3)  |
| >= 30 Kg/M2                                            |                           |                           |               |
| Responders/Treated (%)                                 | 5/7 (71.4)                | 9/9 (100.0)               | 14/16 (87.5)  |
| 95% CI                                                 | (29.0, 96.3)              | (66.4, 100.0)             | (61.7, 98.4)  |
| <b>IL28B RS1297860 Genotype</b>                        |                           |                           |               |
| CC                                                     |                           |                           |               |
| Responders/Treated (%)                                 | 10/11 (90.9)              | 11/11 (100.0)             | 21/22 (95.5)  |
| 95% CI                                                 | (58.7, 99.8)              | (71.5, 100.0)             | (77.2, 99.9)  |
| Non-CC                                                 |                           |                           |               |
| Responders/Treated (%)                                 | 11/13 (84.6)              | 13/15 (86.7)              | 24/28 (85.7)  |
| 95% CI                                                 | (54.6, 98.1)              | (59.5, 98.3)              | (67.3, 96.0)  |
| <b>REB Dose Reduction Or Interruption &gt; 14 Days</b> |                           |                           |               |
| Yes                                                    |                           |                           |               |
| Responders/Treated (%)                                 | 1/2 (50.0)                | 4/4 (100.0)               | 5/6 (83.3)    |
| 95% CI                                                 | (1.3, 98.7)               | (39.8, 100.0)             | (35.9, 99.6)  |
| No                                                     |                           |                           |               |
| Responders/Treated (%)                                 | 20/22 (90.9)              | 20/22 (90.9)              | 40/44 (90.9)  |
| 95% CI                                                 | (70.8, 98.9)              | (70.8, 98.9)              | (78.3, 97.5)  |
| <b>NS5A-M28 Polymorphism</b>                           |                           |                           |               |
| Yes                                                    |                           |                           |               |
| Responders/Treated (%)                                 |                           | 0/1 (0.0)                 | 0/1 (0.0)     |
| 95% CI                                                 |                           | (0.0, 97.5)               | (0.0, 97.5)   |
| No                                                     |                           |                           |               |
| Responders/Treated (%)                                 | 21/24 (87.5)              | 24/25 (96.0)              | 45/49 (91.8)  |
| 95% CI                                                 | (67.6, 97.3)              | (79.6, 99.9)              | (80.4, 97.7)  |
| <b>NS5A-A30 Polymorphism</b>                           |                           |                           |               |
| Yes                                                    |                           |                           |               |
| Responders/Treated (%)                                 | 6/6 (100.0)               |                           | 6/6 (100.0)   |
| 95% CI                                                 | (54.1, 100.0)             |                           | (54.1, 100.0) |
| No                                                     |                           |                           |               |
| Responders/Treated (%)                                 | 15/18 (83.3)              | 24/26 (92.3)              | 39/44 (88.6)  |
| 95% CI                                                 | (58.6, 96.4)              | (74.9, 99.1)              | (75.4, 96.2)  |
| <b>NS5A-L31 Polymorphism</b>                           |                           |                           |               |
| Yes                                                    |                           |                           |               |
| Responders/Treated (%)                                 |                           |                           |               |
| 95% CI                                                 |                           |                           |               |
| No                                                     |                           |                           |               |
| Responders/Treated (%)                                 | 21/24 (87.5)              | 24/26 (92.3)              | 45/50 (90.0)  |
| 95% CI                                                 | (67.6, 97.3)              | (74.9, 99.1)              | (78.2, 96.7)  |
| <b>NS5A-Y93 Polymorphism</b>                           |                           |                           |               |
| Yes                                                    |                           |                           |               |
| Responders/Treated (%)                                 | 0/1 (0.0)                 | 1/1 (100.0)               | 1/2 (50.0)    |
| 95% CI                                                 | (0.0, 97.5)               | (2.5, 100.0)              | (1.3, 98.7)   |
| No                                                     |                           |                           |               |
| Responders/Treated (%)                                 | 21/23 (91.3)              | 23/25 (92.0)              | 44/48 (91.7)  |
| 95% CI                                                 | (72.0, 98.9)              | (74.0, 99.0)              | (80.0, 97.7)  |

**Table S2 (cont)**

| Category<br>Subgroup     | DCV+SOF+RBV 12 WK<br>N=24 | DCV+SOF+RBV 16 WK<br>N=26 | Total<br>N=50 |
|--------------------------|---------------------------|---------------------------|---------------|
| Baseline Steatosis Grade |                           |                           |               |
| 0 (None To <5%)          |                           |                           |               |
| Responders/Treated (%)   |                           | 0/1 (0.0)                 | 0/1 (0.0)     |
| 95% CI                   |                           | (0.0, 97.5)               | (0.0, 97.5)   |
| 1 (5-33%)                |                           |                           |               |
| Responders/Treated (%)   | 1/1 (100.0)               |                           | 1/1 (100.0)   |
| 95% CI                   | (2.5, 100.0)              |                           | (2.5, 100.0)  |
| 2 (34-66%)               |                           |                           |               |
| Responders/Treated (%)   |                           | 1/1 (100.0)               | 1/1 (100.0)   |
| 95% CI                   |                           | (2.5, 100.0)              | (2.5, 100.0)  |
| 3 (67-100%)              |                           |                           |               |
| Responders/Treated (%)   | 0/1 (0.0)                 |                           | 0/1 (0.0)     |
| 95% CI                   | (0.0, 97.5)               |                           | (0.0, 97.5)   |
| Not Reported             |                           |                           |               |
| Responders/Treated (%)   | 20/22 (90.9)              | 23/24 (95.8)              | 43/46 (93.5)  |
| 95% CI                   | (70.8, 98.9)              | (78.9, 99.9)              | (82.1, 98.6)  |

### Table S3. Adverse Events (All-Cause Grades 1-4) on Treatment

| System Organ Class (%)<br>Preferred Term (%)         | DCV+SOF+REV 12 WK<br>N=24 | DCV+SOF+REV 16 WK<br>N=26 | TOTAL<br>N=50 |
|------------------------------------------------------|---------------------------|---------------------------|---------------|
| Total Subjects With An Event                         | 23 (95.8)                 | 24 (92.3)                 | 47 (94.0)     |
| Psychiatric Disorders                                | 14 (58.3)                 | 14 (53.8)                 | 28 (56.0)     |
| Insomnia                                             | 8 (33.3)                  | 7 (26.9)                  | 15 (30.0)     |
| Irritability                                         | 5 (20.8)                  | 2 (7.7)                   | 7 (14.0)      |
| Depressed Mood                                       | 1 (4.2)                   | 2 (7.7)                   | 3 (6.0)       |
| Depression                                           | 1 (4.2)                   | 2 (7.7)                   | 3 (6.0)       |
| Abnormal Dreams                                      | 1 (4.2)                   | 1 (3.8)                   | 2 (4.0)       |
| Agitation                                            | 1 (4.2)                   | 0                         | 1 (2.0)       |
| Anxiety                                              | 0                         | 1 (3.8)                   | 1 (2.0)       |
| Middle Insomnia                                      | 0                         | 1 (3.8)                   | 1 (2.0)       |
| General Disorders And Administration Site Conditions | 9 (37.5)                  | 13 (50.0)                 | 22 (44.0)     |
| Fatigue                                              | 6 (25.0)                  | 7 (26.9)                  | 13 (26.0)     |
| Asthenia                                             | 2 (8.3)                   | 5 (19.2)                  | 7 (14.0)      |
| Chest Pain                                           | 1 (4.2)                   | 0                         | 1 (2.0)       |
| Chills                                               | 1 (4.2)                   | 0                         | 1 (2.0)       |
| Influenza Like Illness                               | 1 (4.2)                   | 0                         | 1 (2.0)       |
| Mass                                                 | 1 (4.2)                   | 0                         | 1 (2.0)       |
| Oedema Peripheral                                    | 0                         | 1 (3.8)                   | 1 (2.0)       |
| Pain                                                 | 1 (4.2)                   | 0                         | 1 (2.0)       |
| Nervous System Disorders                             | 11 (45.8)                 | 11 (42.3)                 | 22 (44.0)     |
| Headache                                             | 7 (29.2)                  | 5 (19.2)                  | 12 (24.0)     |
| Lethargy                                             | 2 (8.3)                   | 2 (7.7)                   | 4 (8.0)       |
| Disturbance In Attention                             | 1 (4.2)                   | 1 (3.8)                   | 2 (4.0)       |
| Carotid Artery Stenosis                              | 0                         | 1 (3.8)                   | 1 (2.0)       |
| Dizziness                                            | 1 (4.2)                   | 0                         | 1 (2.0)       |
| Memory Impairment                                    | 1 (4.2)                   | 0                         | 1 (2.0)       |
| Paraesthesia                                         | 0                         | 1 (3.8)                   | 1 (2.0)       |
| Somnolence                                           | 1 (4.2)                   | 0                         | 1 (2.0)       |
| Syncope                                              | 0                         | 1 (3.8)                   | 1 (2.0)       |
| Gastrointestinal Disorders                           | 7 (29.2)                  | 12 (46.2)                 | 19 (38.0)     |
| Diarrhoea                                            | 1 (4.2)                   | 4 (15.4)                  | 5 (10.0)      |
| Nausea                                               | 3 (12.5)                  | 1 (3.8)                   | 4 (8.0)       |
| Abdominal Discomfort                                 | 0                         | 2 (7.7)                   | 2 (4.0)       |
| Abdominal Pain                                       | 0                         | 2 (7.7)                   | 2 (4.0)       |
| Abdominal Pain Upper                                 | 2 (8.3)                   | 0                         | 2 (4.0)       |
| Gastrooesophageal Reflux Disease                     | 1 (4.2)                   | 1 (3.8)                   | 2 (4.0)       |
| Mouth Ulceration                                     | 0                         | 2 (7.7)                   | 2 (4.0)       |
| Tooth Loss                                           | 1 (4.2)                   | 1 (3.8)                   | 2 (4.0)       |
| Vomiting                                             | 1 (4.2)                   | 1 (3.8)                   | 2 (4.0)       |
| Dry Mouth                                            | 0                         | 1 (3.8)                   | 1 (2.0)       |
| Dyspepsia                                            | 0                         | 1 (3.8)                   | 1 (2.0)       |
| Frequent Bowel Movements                             | 1 (4.2)                   | 0                         | 1 (2.0)       |
| Varices Oesophageal                                  | 0                         | 1 (3.8)                   | 1 (2.0)       |
| Skin And Subcutaneous Tissue Disorders               | 9 (37.5)                  | 4 (15.4)                  | 13 (26.0)     |
| Pruritus                                             | 1 (4.2)                   | 2 (7.7)                   | 3 (6.0)       |
| Dry Skin                                             | 2 (8.3)                   | 0                         | 2 (4.0)       |
| Hyperhidrosis                                        | 2 (8.3)                   | 0                         | 2 (4.0)       |
| Photosensitivity Reaction                            | 2 (8.3)                   | 0                         | 2 (4.0)       |
| Rash                                                 | 1 (4.2)                   | 1 (3.8)                   | 2 (4.0)       |
| Blood Blister                                        | 1 (4.2)                   | 0                         | 1 (2.0)       |
| Skin And Subcutaneous Tissue Disorders               |                           |                           |               |
| Eczema                                               | 0                         | 1 (3.8)                   | 1 (2.0)       |
| Erythema                                             | 0                         | 1 (3.8)                   | 1 (2.0)       |
| Hand Dermatitis                                      | 1 (4.2)                   | 0                         | 1 (2.0)       |
| Pruritus Generalised                                 | 1 (4.2)                   | 0                         | 1 (2.0)       |
| Rash Erythematous                                    | 1 (4.2)                   | 0                         | 1 (2.0)       |
| Rash Maculo-Papular                                  | 0                         | 1 (3.8)                   | 1 (2.0)       |
| Respiratory, Thoracic And Mediastinal Disorders      | 6 (25.0)                  | 4 (15.4)                  | 10 (20.0)     |
| Dyspnoea                                             | 2 (8.3)                   | 3 (11.5)                  | 5 (10.0)      |
| Cough                                                | 1 (4.2)                   | 1 (3.8)                   | 2 (4.0)       |
| Dyspnoea Exertional                                  | 1 (4.2)                   | 0                         | 1 (2.0)       |
| Productive Cough                                     | 1 (4.2)                   | 0                         | 1 (2.0)       |
| Rhinorrhoea                                          | 1 (4.2)                   | 0                         | 1 (2.0)       |
| Infections And Infestations                          | 4 (16.7)                  | 3 (11.5)                  | 7 (14.0)      |
| Nasopharyngitis                                      | 1 (4.2)                   | 1 (3.8)                   | 2 (4.0)       |
| Upper Respiratory Tract Infection                    | 1 (4.2)                   | 1 (3.8)                   | 2 (4.0)       |
| Gastrointestinal Infection                           | 1 (4.2)                   | 0                         | 1 (2.0)       |
| Pneumonia                                            | 0                         | 1 (3.8)                   | 1 (2.0)       |
| Respiratory Tract Infection                          | 1 (4.2)                   | 0                         | 1 (2.0)       |
| Viral Upper Respiratory Tract Infection              | 1 (4.2)                   | 0                         | 1 (2.0)       |
| Musculoskeletal And Connective Tissue Disorders      | 2 (8.3)                   | 5 (19.2)                  | 7 (14.0)      |
| Back Pain                                            | 0                         | 3 (11.5)                  | 3 (6.0)       |
| Muscle Spasms                                        | 1 (4.2)                   | 1 (3.8)                   | 2 (4.0)       |



**Table S3 (cont).**

| System Organ Class (%)<br>Preferred Term (%)                        | DCV+SOF+REV 12 WK<br>N=24 | DCV+SOF+REV 16 WK<br>N=26 | TOTAL<br>N=50 |
|---------------------------------------------------------------------|---------------------------|---------------------------|---------------|
| Musculoskeletal And Connective Tissue Disorders                     |                           |                           |               |
| Arthralgia                                                          | 0                         | 1 ( 3.8)                  | 1 ( 2.0)      |
| Myalgia                                                             | 1 ( 4.2)                  | 0                         | 1 ( 2.0)      |
| Neck Pain                                                           | 0                         | 1 ( 3.8)                  | 1 ( 2.0)      |
| Pain In Extremity                                                   | 0                         | 1 ( 3.8)                  | 1 ( 2.0)      |
| Vascular Disorders                                                  | 1 ( 4.2)                  | 5 (19.2)                  | 6 (12.0)      |
| Hypertension                                                        | 0                         | 3 (11.5)                  | 3 ( 6.0)      |
| Arteriosclerosis                                                    | 0                         | 1 ( 3.8)                  | 1 ( 2.0)      |
| Arteritis                                                           | 0                         | 1 ( 3.8)                  | 1 ( 2.0)      |
| Haematoma                                                           | 1 ( 4.2)                  | 0                         | 1 ( 2.0)      |
| Blood And Lymphatic System Disorders                                | 0                         | 2 ( 7.7)                  | 2 ( 4.0)      |
| Anaemia                                                             | 0                         | 2 ( 7.7)                  | 2 ( 4.0)      |
| Cardiac Disorders                                                   | 1 ( 4.2)                  | 1 ( 3.8)                  | 2 ( 4.0)      |
| Congestive Cardiomyopathy                                           | 1 ( 4.2)                  | 0                         | 1 ( 2.0)      |
| Palpitations                                                        | 0                         | 1 ( 3.8)                  | 1 ( 2.0)      |
| Ear And Labyrinth Disorders                                         | 1 ( 4.2)                  | 1 ( 3.8)                  | 2 ( 4.0)      |
| Tinnitus                                                            | 0                         | 1 ( 3.8)                  | 1 ( 2.0)      |
| Vertigo                                                             | 1 ( 4.2)                  | 0                         | 1 ( 2.0)      |
| Metabolism And Nutrition Disorders                                  | 0                         | 2 ( 7.7)                  | 2 ( 4.0)      |
| Decreased Appetite                                                  | 0                         | 2 ( 7.7)                  | 2 ( 4.0)      |
| Renal And Urinary Disorders                                         | 1 ( 4.2)                  | 1 ( 3.8)                  | 2 ( 4.0)      |
| Nocturia                                                            | 0                         | 1 ( 3.8)                  | 1 ( 2.0)      |
| Pollakiuria                                                         | 1 ( 4.2)                  | 0                         | 1 ( 2.0)      |
| Reproductive System And Breast Disorders                            | 2 ( 8.3)                  | 0                         | 2 ( 4.0)      |
| Atrophic Vulvovaginitis                                             | 1 ( 4.2)                  | 0                         | 1 ( 2.0)      |
| Vulval Angiokeratoma                                                | 1 ( 4.2)                  | 0                         | 1 ( 2.0)      |
| Vulval Disorder                                                     | 1 ( 4.2)                  | 0                         | 1 ( 2.0)      |
| Eye Disorders                                                       | 1 ( 4.2)                  | 0                         | 1 ( 2.0)      |
| Dry Eye                                                             | 1 ( 4.2)                  | 0                         | 1 ( 2.0)      |
| Investigations                                                      | 1 ( 4.2)                  | 0                         | 1 ( 2.0)      |
| Haemoglobin Decreased                                               | 1 ( 4.2)                  | 0                         | 1 ( 2.0)      |
| Neoplasms Benign, Malignant And Unspecified (Incl Cysts And Polyps) | 0                         | 1 ( 3.8)                  | 1 ( 2.0)      |
| Basal Cell Carcinoma                                                | 0                         | 1 ( 3.8)                  | 1 ( 2.0)      |
